# Supplementary material
Source: PubMed Central journal article supplement (PMC8994207)

Supporting Information

# Discovery of Arylsulfonamides as Dual Orexin Receptor Agonists

*Dehui Zhang,<sup>a</sup> David A. Perrey,<sup>a</sup> Ann M. Decker,<sup>a</sup> Tiffany L. Langston,<sup>a</sup> Vijayakumar Mavanji,<sup>b</sup>*

*Danni L. Harris,<sup>a</sup> Catherine M. Kotz,<sup>b,c,d</sup> and Yanan Zhang<sup>a,\*</sup>*

<sup>a</sup> Research Triangle Institute, Research Triangle Park, North Carolina 27709

<sup>b</sup> Research Service, Veterans Affairs Health Care System, Minneapolis, MN 55417

<sup>c</sup> Department of Integrative Biology and Physiology, University of Minnesota, Minneapolis,  
MN 55455

<sup>d</sup> Geriatric, Research, Education and Clinical Center, Minneapolis Veterans Affairs Health  
Care System, Minneapolis, MN 55417

\* Corresponding Author: [yzhang@rti.org](mailto:yzhang@rti.org)

## Table of Contents

|                                                        |     |
|--------------------------------------------------------|-----|
| 1. HPLC purity and retention time                      | S2  |
| 2. HPLC traces of representative target compounds      | S4  |
| 3. <sup>1</sup> H and <sup>13</sup> C NMR of <b>40</b> | S19 |

Compound purity by HPLC

| Compound | Retention time (min) | Purity (%) |
|----------|----------------------|------------|
| 2        | 12.421               | 98.3       |
| 6        | 13.372               | 98.4       |
| 7        | 13.576               | >99        |
| 8        | 12.923               | >99        |
| 9        | 13.105               | 99.0       |
| 10       | 11.049               | 96.8       |
| 11       | 11.084               | 95.0       |
| 12       | 15.528               | 99.0       |
| 13       | 11.274               | 95.1       |
| 14       | 12.154               | 96.9       |
| 15       | 15.874               | >99        |
| 16       | 14.823               | 95.1       |
| 17       | 13.976               | 98.1       |
| 18       | 11.910               | 95.2       |
| 19       | 13.367               | 95.0       |
| 20       | 12.836               | 95.6       |
| 21       | 14.411               | 96.2       |
| 22       | 12.928               | >99        |
| 23       | 14.793               | >99        |
| 24       | 12.713               | 98.3       |
| 25       | 12.302               | 98.9       |
| 26       | 12.720               | >99        |
| 27       | 13.467               | >99        |
| 28       | 13.683               | 98.7       |
| 29       | 13.635               | 98.7       |
| 30       | 14.107               | 98.9       |
| 31       | 13.028               | 95.3       |
| 32       | 16.023               | 96.2       |
| 33       | 12.592               | 95.6       |
| 34       | 12.506               | 98.4       |
| 35       | 13.091               | 96.1       |

|           |        |      |
|-----------|--------|------|
| <b>36</b> | 15.585 | >99  |
| <b>37</b> | 12.767 | 98.6 |
| <b>38</b> | 12.642 | >99  |
| <b>39</b> | 12.517 | 98.2 |
| <b>40</b> | 12.497 | >99  |
| <b>41</b> | 12.653 | 98.1 |
| <b>42</b> | 12.395 | 97.8 |
| <b>43</b> | 13.951 | 98.5 |
| <b>44</b> | 12.455 | >99  |

## SAMPLE INFORMATION

|                   |                          |                     |                           |
|-------------------|--------------------------|---------------------|---------------------------|
| Sample Name:      | 13937-054                | Acquired By:        | walkup                    |
| Sample Type:      | Unknown                  | Sample Set Name:    | DehuiDavidHPLC            |
| Vial:             | 1                        | Acq. Method Set:    | MethodSetAB5T95B15Min     |
| Injection #:      | 1                        | Processing Method:  | 220W280W15MIN             |
| Injection Volume: | 20.00 ul                 | Channel Name:       | W2996 280.0nm-4.0         |
| Run Time:         | 30.0 Minutes             | Proc. Chnl. Descr.: | W2996 PDA 280.0 nm at 4.0 |
| Date Acquired:    | 1/27/2021 7:35:50 PM EST |                     |                           |
| Date Processed:   | 4/2/2021 3:27:05 PM EST  |                     |                           |

## Auto-Scaled Chromatogram

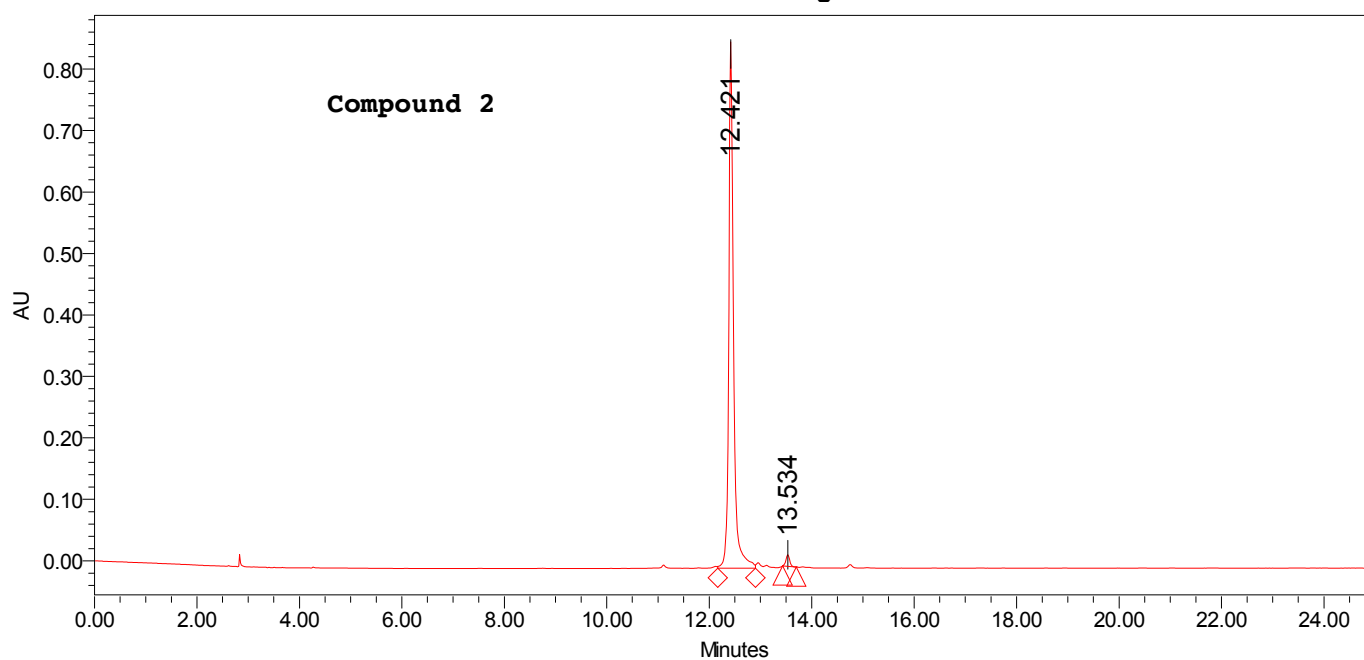

## Peak Results

|   | RT     | Area    | % Area | Height |
|---|--------|---------|--------|--------|
| 1 | 12.421 | 5498165 | 98.29  | 851114 |
| 2 | 13.534 | 95466   | 1.71   | 18474  |

## SAMPLE INFORMATION

|                   |                          |                     |                           |
|-------------------|--------------------------|---------------------|---------------------------|
| Sample Name:      | 13937-081                | Acquired By:        | walkup                    |
| Sample Type:      | Unknown                  | Sample Set Name:    | DehuiDavidHPLC            |
| Vial:             | 5                        | Acq. Method Set:    | MethodSetAB5T95B15Min     |
| Injection #:      | 1                        | Processing Method:  | 220W280W15MIN             |
| Injection Volume: | 20.00 ul                 | Channel Name:       | W2996 280.0nm-4.0         |
| Run Time:         | 30.0 Minutes             | Proc. Chnl. Descr.: | W2996 PDA 280.0 nm at 4.0 |
| Date Acquired:    | 1/27/2021 9:39:58 PM EST |                     |                           |
| Date Processed:   | 4/2/2021 3:59:12 PM EST  |                     |                           |

## Auto-Scaled Chromatogram

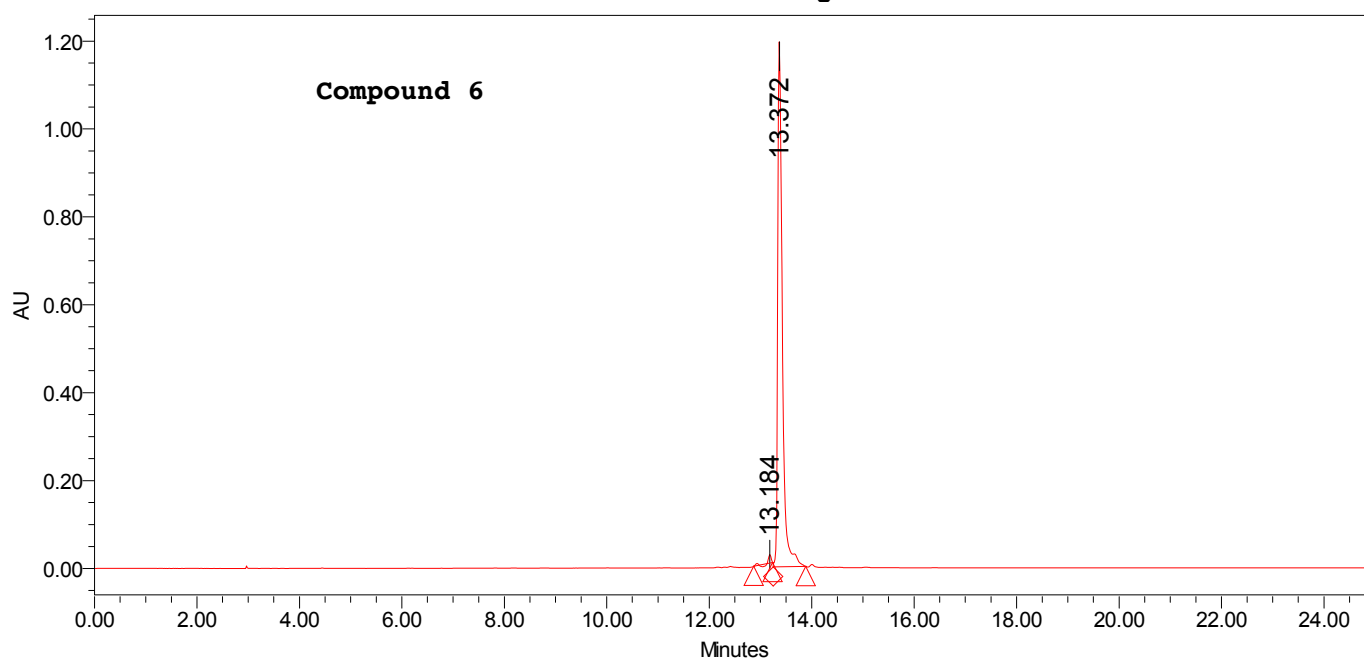

## Peak Results

|   | RT     | Area    | % Area | Height  |
|---|--------|---------|--------|---------|
| 1 | 13.184 | 118486  | 1.58   | 18186   |
| 2 | 13.372 | 7396048 | 98.42  | 1204050 |

## SAMPLE INFORMATION

|                   |                          |                     |                           |
|-------------------|--------------------------|---------------------|---------------------------|
| Sample Name:      | 13937-074                | Acquired By:        | walkup                    |
| Sample Type:      | Unknown                  | Sample Set Name:    | DehuiDavidHPLC            |
| Vial:             | 2                        | Acq. Method Set:    | MethodSetAB5T95B15Min     |
| Injection #:      | 1                        | Processing Method:  | 220W280W15MIN             |
| Injection Volume: | 20.00 ul                 | Channel Name:       | W2996 280.0nm-4.0         |
| Run Time:         | 30.0 Minutes             | Proc. Chnl. Descr.: | W2996 PDA 280.0 nm at 4.0 |
| Date Acquired:    | 1/27/2021 8:06:52 PM EST |                     |                           |
| Date Processed:   | 4/2/2021 4:00:39 PM EST  |                     |                           |

## Auto-Scaled Chromatogram

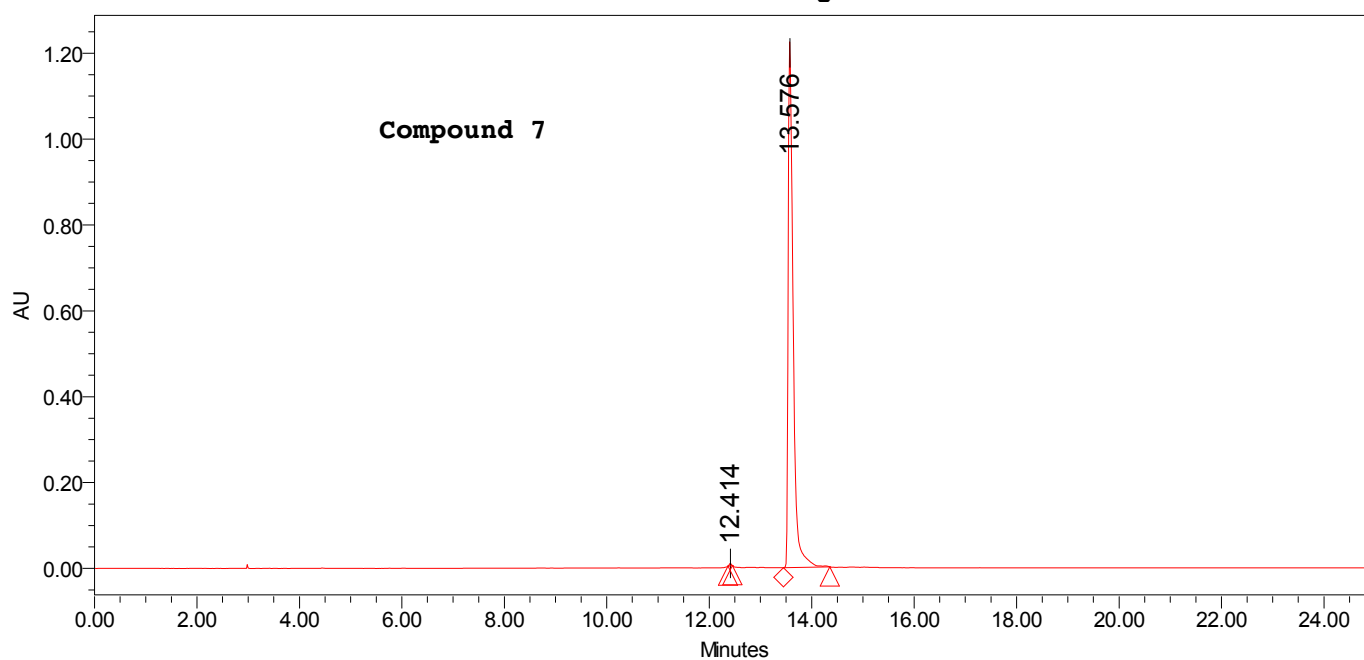

## Peak Results

|   | RT     | Area    | % Area | Height  |
|---|--------|---------|--------|---------|
| 1 | 12.414 | 15531   | 0.19   | 5298    |
| 2 | 13.576 | 8317200 | 99.81  | 1256770 |

## SAMPLE INFORMATION

|                   |                          |                     |                           |
|-------------------|--------------------------|---------------------|---------------------------|
| Sample Name:      | 14045-085                | Acquired By:        | walkup                    |
| Sample Type:      | Unknown                  | Sample Set Name:    | DehuiDavidHPLC            |
| Vial:             | 12                       | Acq. Method Set:    | MethodSetAB5T95B15Min     |
| Injection #:      | 1                        | Processing Method:  | 220W280W15MIN             |
| Injection Volume: | 20.00 ul                 | Channel Name:       | W2996 280.0nm-4.0         |
| Run Time:         | 30.0 Minutes             | Proc. Chnl. Descr.: | W2996 PDA 280.0 nm at 4.0 |
| Date Acquired:    | 1/28/2021 1:17:08 AM EST |                     |                           |
| Date Processed:   | 4/2/2021 4:03:30 PM EST  |                     |                           |

## Auto-Scaled Chromatogram

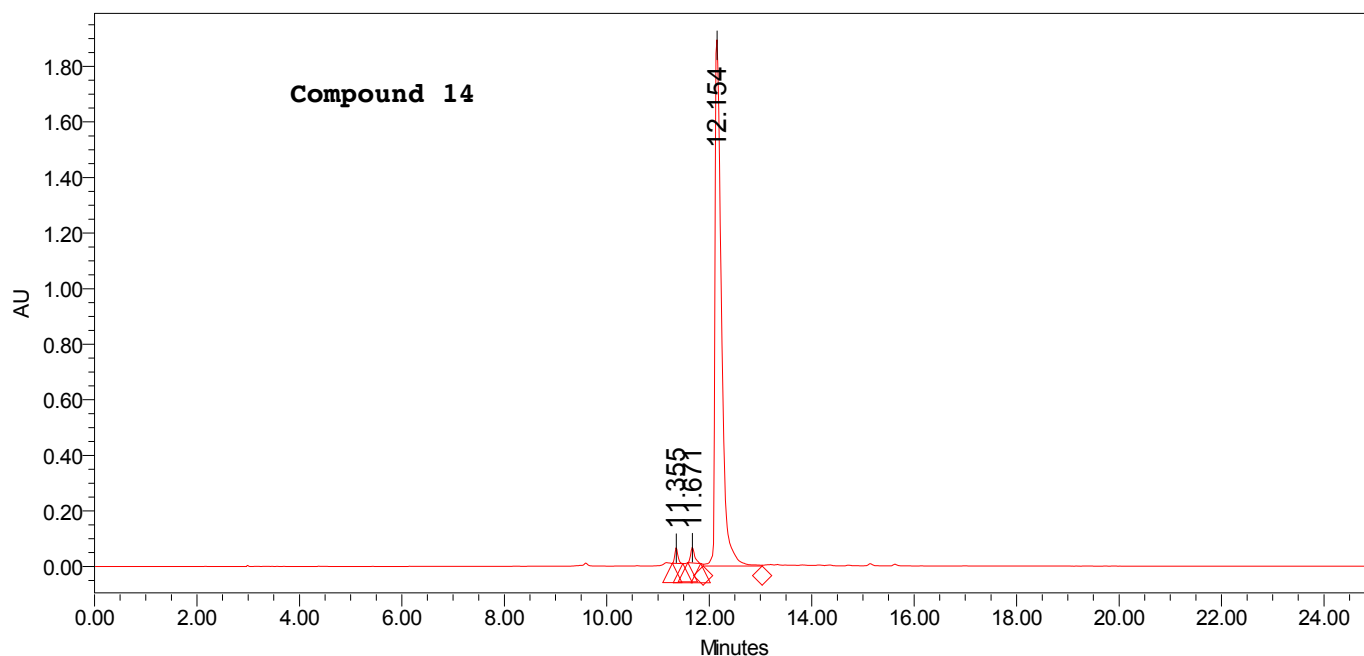

## Peak Results

|   | RT     | Area     | % Area | Height  |
|---|--------|----------|--------|---------|
| 1 | 11.355 | 233116   | 1.35   | 54519   |
| 2 | 11.671 | 300555   | 1.74   | 54890   |
| 3 | 12.154 | 16725811 | 96.91  | 1914526 |

## SAMPLE INFORMATION

|                   |                          |                     |                           |
|-------------------|--------------------------|---------------------|---------------------------|
| Sample Name:      | 14045-093                | Acquired By:        | walkup                    |
| Sample Type:      | Unknown                  | Sample Set Name:    | DehuiDavidHPLC            |
| Vial:             | 13                       | Acq. Method Set:    | MethodSetAB5T95B15Min     |
| Injection #:      | 1                        | Processing Method:  | 220W280W15MIN             |
| Injection Volume: | 20.00 ul                 | Channel Name:       | W2996 280.0nm-4.0         |
| Run Time:         | 30.0 Minutes             | Proc. Chnl. Descr.: | W2996 PDA 280.0 nm at 4.0 |
| Date Acquired:    | 1/28/2021 1:48:11 AM EST |                     |                           |
| Date Processed:   | 4/2/2021 4:07:03 PM EST  |                     |                           |

## Auto-Scaled Chromatogram

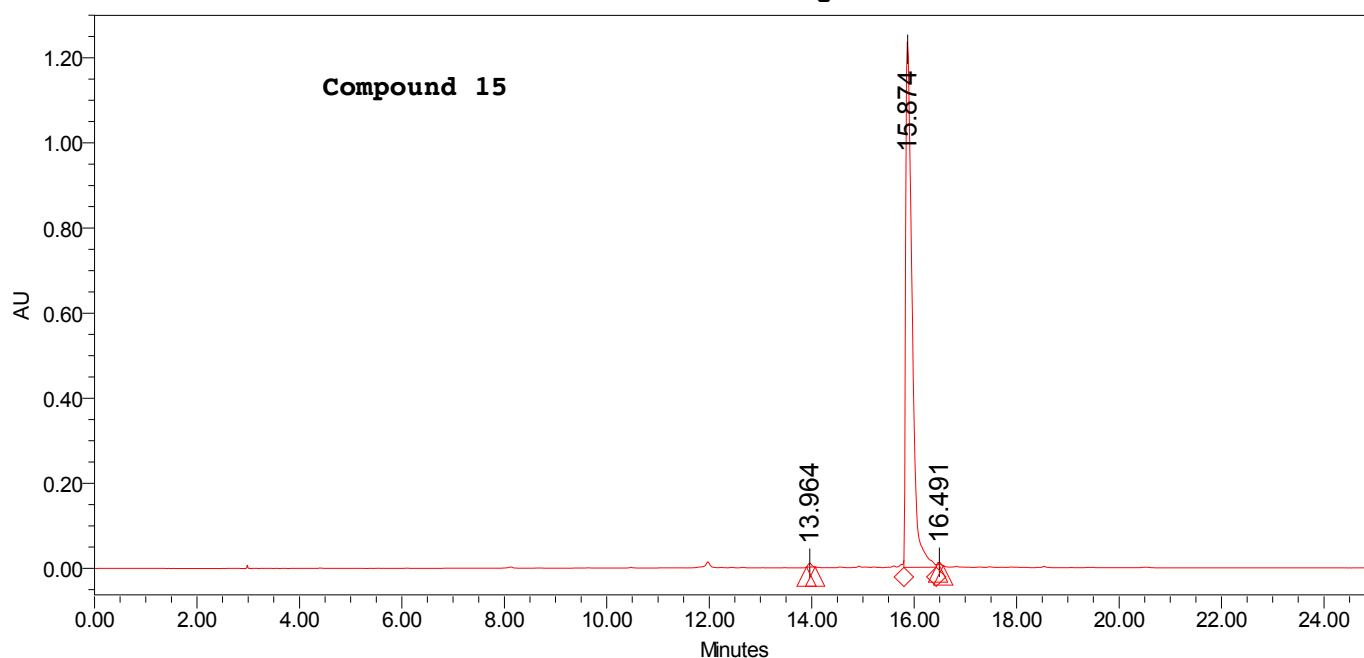

## Peak Results

|   | RT     | Area     | % Area | Height  |
|---|--------|----------|--------|---------|
| 1 | 13.964 | 42013    | 0.39   | 8978    |
| 2 | 15.874 | 10856650 | 99.51  | 1266499 |
| 3 | 16.491 | 11883    | 0.11   | 3511    |



## SAMPLE INFORMATION

|                   |                         |                     |                           |
|-------------------|-------------------------|---------------------|---------------------------|
| Sample Name:      | DZ14227-23              | Acquired By:        | walkup                    |
| Sample Type:      | Unknown                 | Sample Set Name:    | DZ142272325               |
| Vial:             | 25                      | Acq. Method Set:    | MethodSetAB5T95B15Min     |
| Injection #:      | 1                       | Processing Method:  | 220W280W15MIN             |
| Injection Volume: | 20.00 ul                | Channel Name:       | W2996 280.0nm-4.0         |
| Run Time:         | 30.0 Minutes            | Proc. Chnl. Descr.: | W2996 PDA 280.0 nm at 4.0 |
| Date Acquired:    | 9/1/2020 7:35:26 PM EDT |                     |                           |
| Date Processed:   | 4/2/2021 4:27:47 PM EST |                     |                           |

## Auto-Scaled Chromatogram

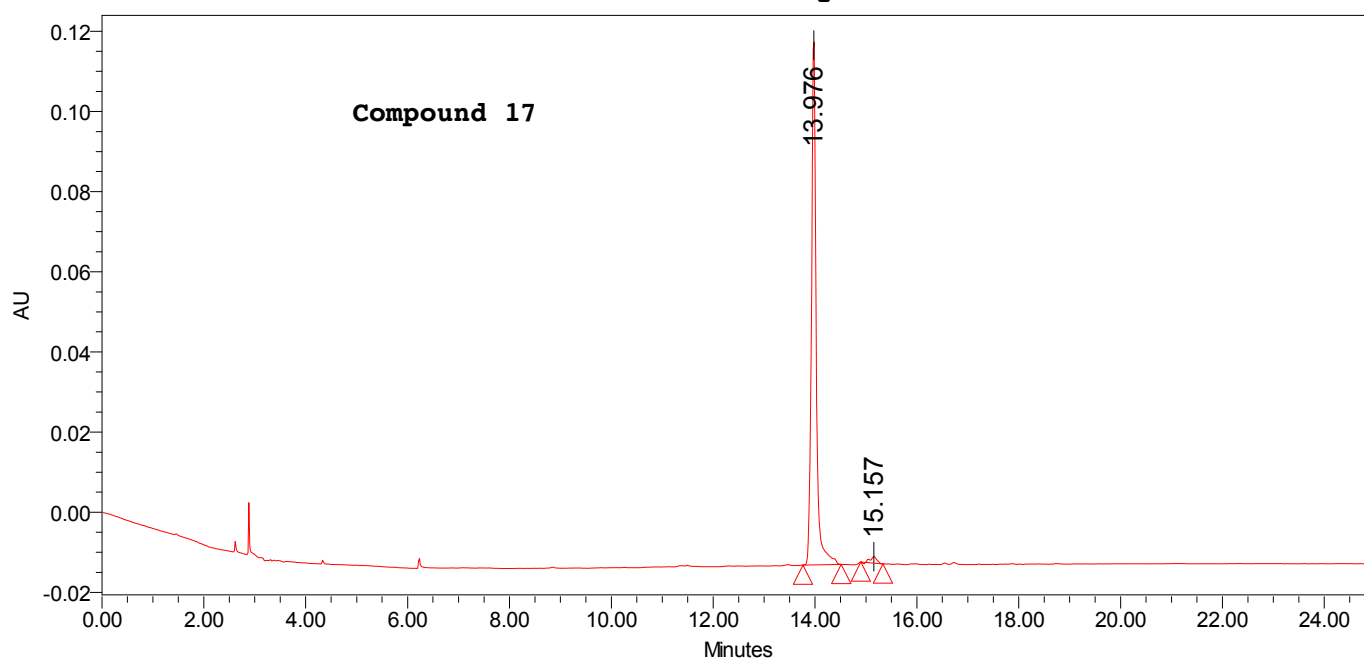

## Peak Results

|   | RT     | Area   | % Area | Height |
|---|--------|--------|--------|--------|
| 1 | 13.976 | 841421 | 98.10  | 130310 |
| 2 | 15.157 | 16278  | 1.90   | 1659   |

## SAMPLE INFORMATION

|                   |                          |                     |                           |
|-------------------|--------------------------|---------------------|---------------------------|
| Sample Name:      | 14045-181                | Acquired By:        | walkup                    |
| Sample Type:      | Unknown                  | Sample Set Name:    | DehuiDavidHPLC            |
| Vial:             | 17                       | Acq. Method Set:    | MethodSetAB5T95B15Min     |
| Injection #:      | 1                        | Processing Method:  | 220W280W15MIN             |
| Injection Volume: | 20.00 ul                 | Channel Name:       | W2996 280.0nm-4.0         |
| Run Time:         | 30.0 Minutes             | Proc. Chnl. Descr.: | W2996 PDA 280.0 nm at 4.0 |
| Date Acquired:    | 1/28/2021 3:52:18 AM EST |                     |                           |
| Date Processed:   | 4/2/2021 4:13:14 PM EST  |                     |                           |

## Auto-Scaled Chromatogram

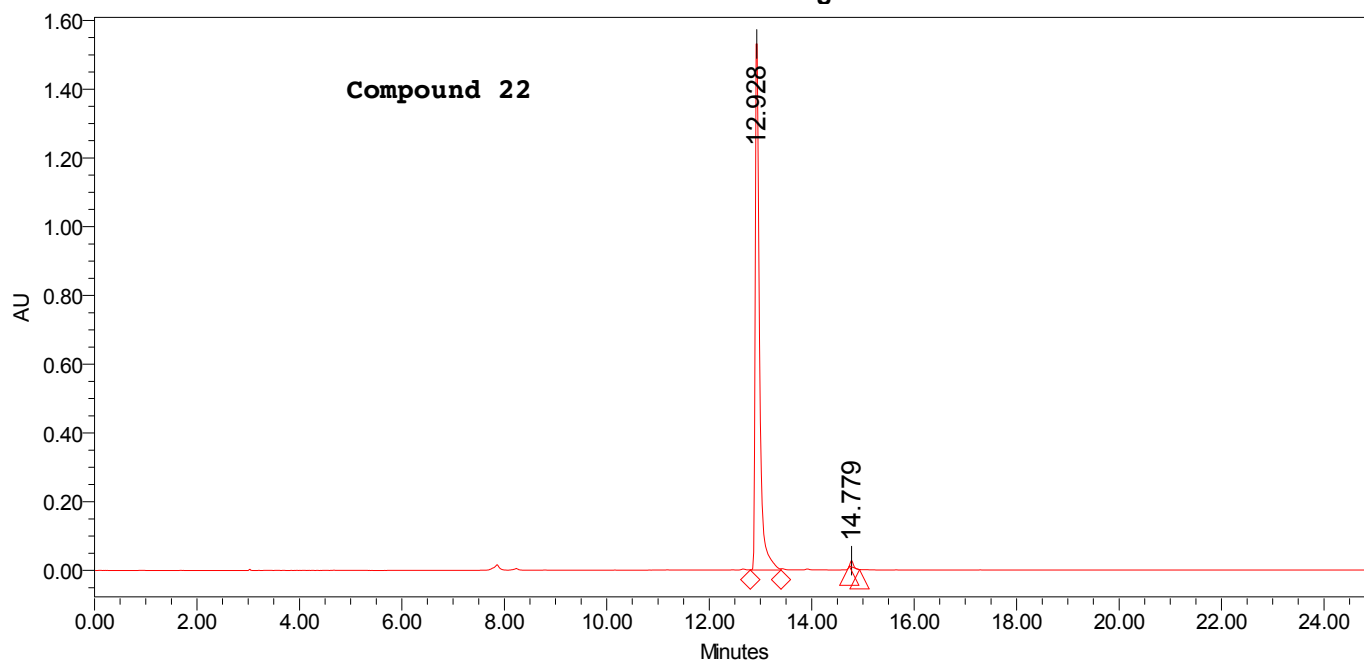

## Peak Results

|   | RT     | Area    | % Area | Height  |
|---|--------|---------|--------|---------|
| 1 | 12.928 | 9081791 | 99.21  | 1563802 |
| 2 | 14.779 | 72481   | 0.79   | 18104   |

## SAMPLE INFORMATION

|                   |                         |                     |                           |
|-------------------|-------------------------|---------------------|---------------------------|
| Sample Name:      | 14171-57                | Acquired By:        | walkup                    |
| Sample Type:      | Unknown                 | Sample Set Name:    | DZOXAgonist paper         |
| Vial:             | 98                      | Acq. Method Set:    | MethodSetAB5T95B15Min     |
| Injection #:      | 1                       | Processing Method:  | 220W280W15MIN             |
| Injection Volume: | 10.00 ul                | Channel Name:       | W2996 280.0nm-4.0         |
| Run Time:         | 30.0 Minutes            | Proc. Chnl. Descr.: | W2996 PDA 280.0 nm at 4.0 |
| Date Acquired:    | 9/4/2020 7:42:29 PM EDT |                     |                           |
| Date Processed:   | 4/2/2021 4:29:40 PM EST |                     |                           |

## Auto-Scaled Chromatogram

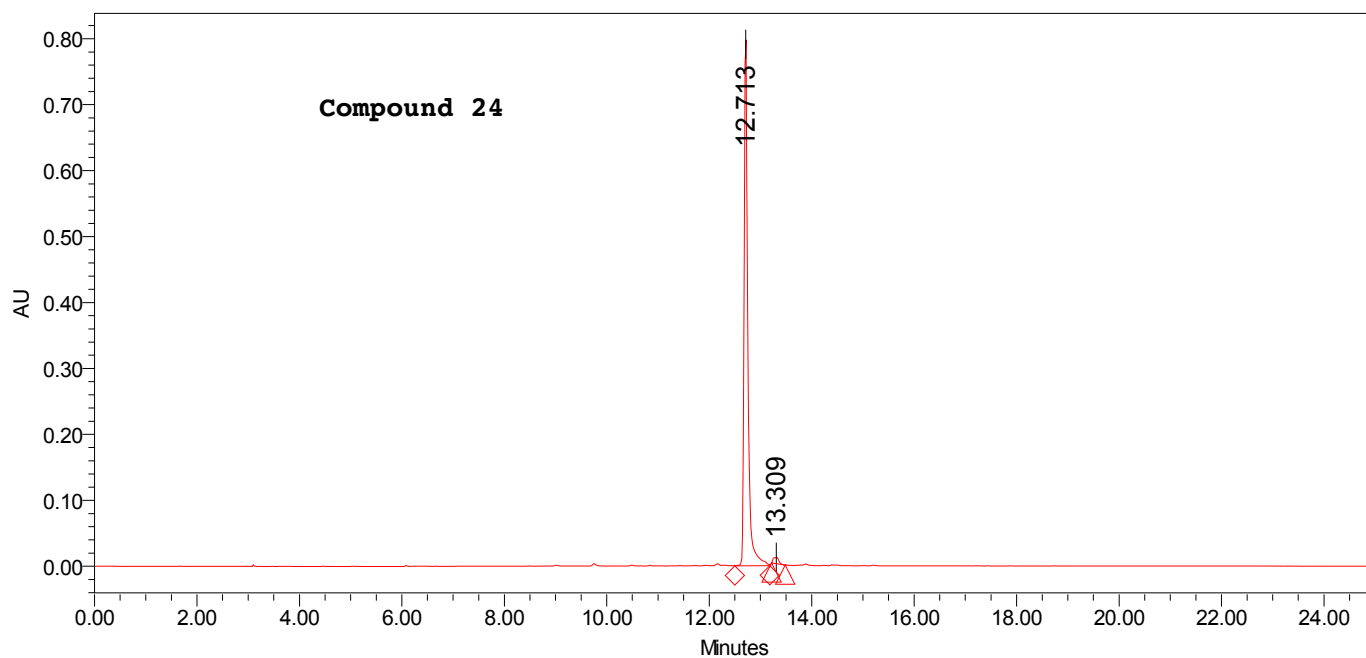

## Peak Results

|   | RT     | Area    | % Area | Height |
|---|--------|---------|--------|--------|
| 1 | 12.713 | 4034950 | 98.29  | 785179 |
| 2 | 13.309 | 70221   | 1.71   | 9906   |

## SAMPLE INFORMATION

|                   |                         |                     |                           |
|-------------------|-------------------------|---------------------|---------------------------|
| Sample Name:      | 14171-62                | Acquired By:        | walkup                    |
| Sample Type:      | Unknown                 | Sample Set Name:    | DZ1417162OXpaper          |
| Vial:             | 1                       | Acq. Method Set:    | MethodSetAB5T95B15Min     |
| Injection #:      | 1                       | Processing Method:  | 220W280W15MIN             |
| Injection Volume: | 10.00 ul                | Channel Name:       | W2996 280.0nm-4.0         |
| Run Time:         | 30.0 Minutes            | Proc. Chnl. Descr.: | W2996 PDA 280.0 nm at 4.0 |
| Date Acquired:    | 9/5/2020 3:47:42 PM EDT |                     |                           |
| Date Processed:   | 4/2/2021 4:31:33 PM EST |                     |                           |

## Auto-Scaled Chromatogram

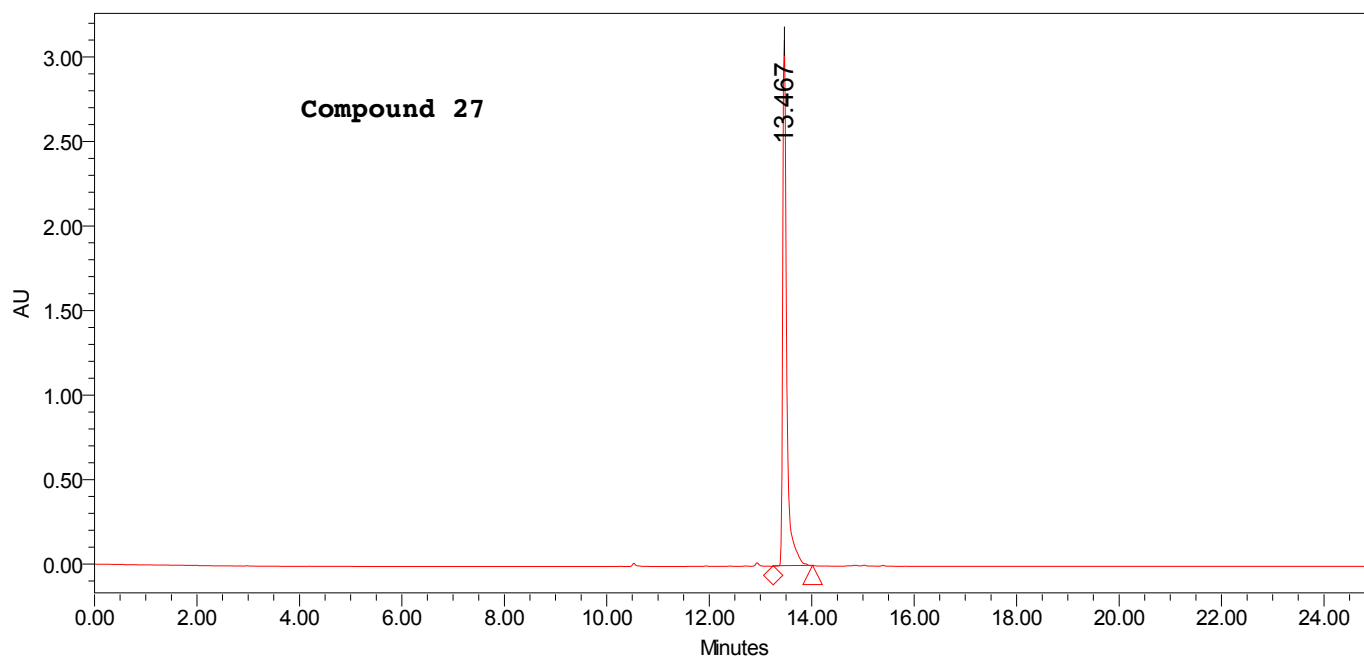

## Peak Results

|   | RT     | Area     | % Area | Height  |
|---|--------|----------|--------|---------|
| 1 | 13.467 | 16853280 | 100.00 | 3135157 |

## SAMPLE INFORMATION

|                   |                         |                     |                           |
|-------------------|-------------------------|---------------------|---------------------------|
| Sample Name:      | 14171-65                | Acquired By:        | walkup                    |
| Sample Type:      | Unknown                 | Sample Set Name:    | DZOXAgonist paper         |
| Vial:             | 100                     | Acq. Method Set:    | MethodSetAB5T95B15Min     |
| Injection #:      | 1                       | Processing Method:  | 220W280W15MIN             |
| Injection Volume: | 10.00 ul                | Channel Name:       | W2996 280.0nm-4.0         |
| Run Time:         | 30.0 Minutes            | Proc. Chnl. Descr.: | W2996 PDA 280.0 nm at 4.0 |
| Date Acquired:    | 9/4/2020 8:44:24 PM EDT |                     |                           |
| Date Processed:   | 4/2/2021 4:32:39 PM EST |                     |                           |

## Auto-Scaled Chromatogram

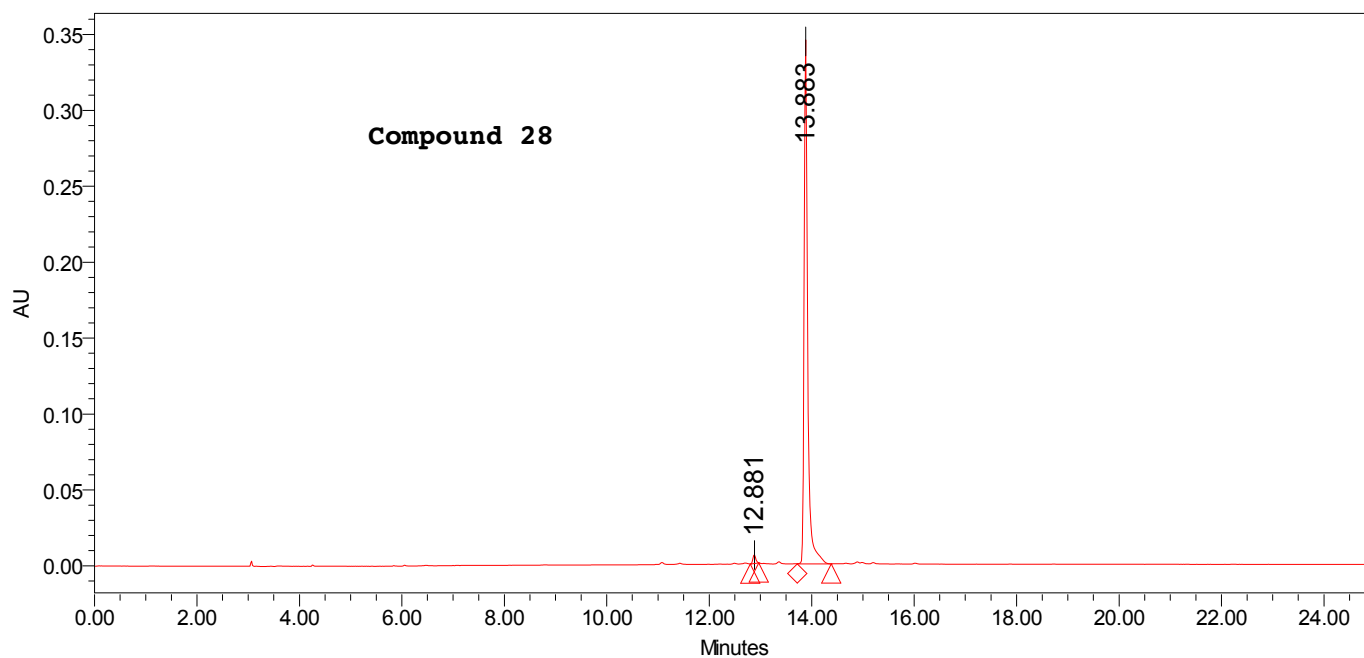

## Peak Results

|   | RT     | Area    | % Area | Height |
|---|--------|---------|--------|--------|
| 1 | 12.881 | 22097   | 1.30   | 5511   |
| 2 | 13.883 | 1680846 | 98.70  | 335519 |

## SAMPLE INFORMATION

|                   |                          |                     |                           |
|-------------------|--------------------------|---------------------|---------------------------|
| Sample Name:      | 14171-113                | Acquired By:        | walkup                    |
| Sample Type:      | Unknown                  | Sample Set Name:    | DZOXAgonist paper         |
| Vial:             | 106                      | Acq. Method Set:    | MethodSetAB5T95B15Min     |
| Injection #:      | 1                        | Processing Method:  | 220W280W15MIN             |
| Injection Volume: | 10.00 ul                 | Channel Name:       | W2996 280.0nm-4.0         |
| Run Time:         | 30.0 Minutes             | Proc. Chnl. Descr.: | W2996 PDA 280.0 nm at 4.0 |
| Date Acquired:    | 9/4/2020 11:50:09 PM EDT |                     |                           |
| Date Processed:   | 4/2/2021 4:36:56 PM EST  |                     |                           |

## Auto-Scaled Chromatogram

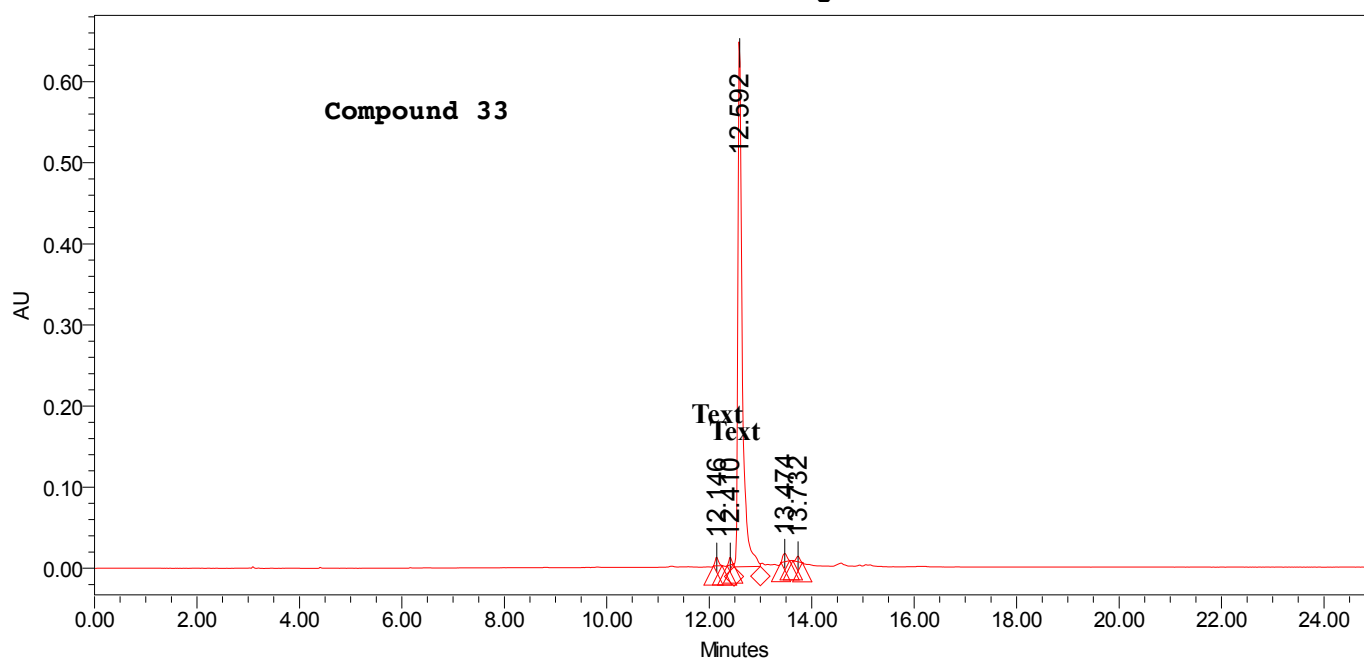

## Peak Results

|   | RT     | Area    | % Area | Height |
|---|--------|---------|--------|--------|
| 1 | 12.146 | 47544   | 1.20   | 10379  |
| 2 | 12.410 | 34343   | 0.87   | 9099   |
| 3 | 12.592 | 3792449 | 95.63  | 646464 |
| 4 | 13.474 | 58210   | 1.47   | 10043  |
| 5 | 13.732 | 33009   | 0.83   | 6942   |

## SAMPLE INFORMATION

|                   |                         |                     |                           |
|-------------------|-------------------------|---------------------|---------------------------|
| Sample Name:      | 14171-116               | Acquired By:        | walkup                    |
| Sample Type:      | Unknown                 | Sample Set Name:    | DZOXAgonist paper         |
| Vial:             | 109                     | Acq. Method Set:    | MethodSetAB5T95B15Min     |
| Injection #:      | 1                       | Processing Method:  | 220W280W15MIN             |
| Injection Volume: | 30.00 ul                | Channel Name:       | W2996 280.0nm-4.0         |
| Run Time:         | 30.0 Minutes            | Proc. Chnl. Descr.: | W2996 PDA 280.0 nm at 4.0 |
| Date Acquired:    | 9/5/2020 1:23:09 AM EDT |                     |                           |
| Date Processed:   | 4/2/2021 4:38:39 PM EST |                     |                           |

## Auto-Scaled Chromatogram

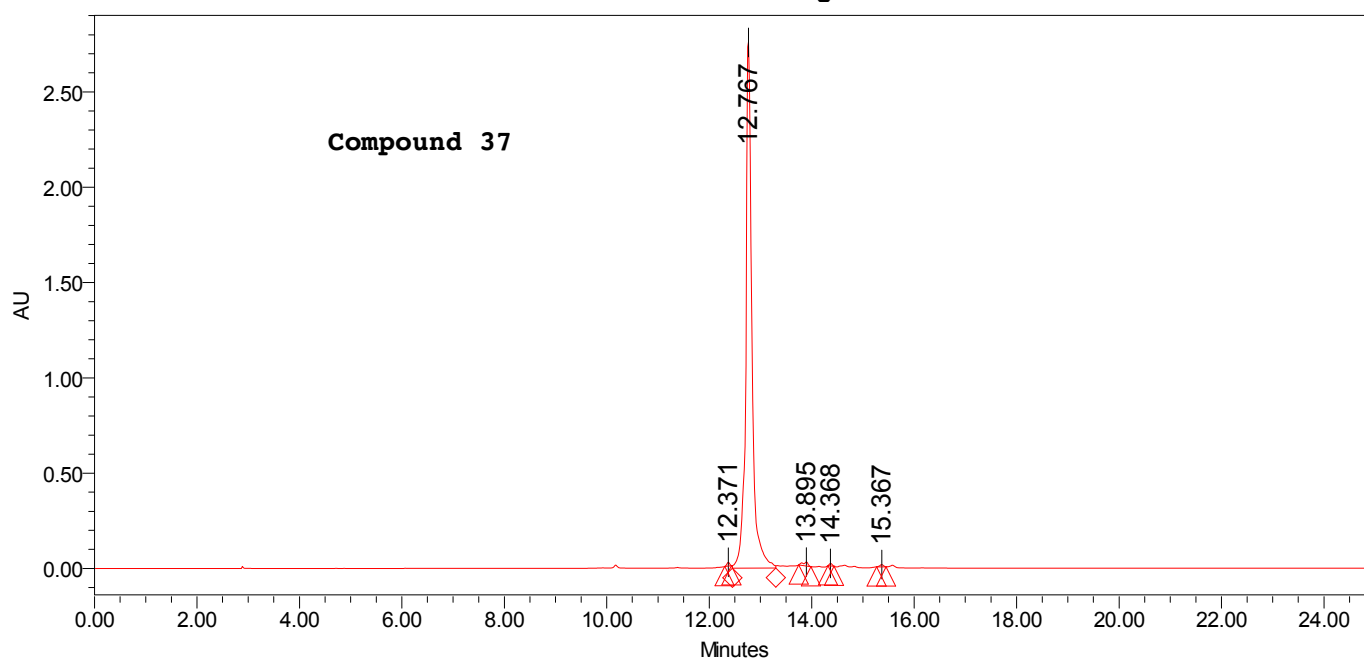

## Peak Results

|   | RT     | Area     | % Area | Height  |
|---|--------|----------|--------|---------|
| 1 | 12.371 | 75931    | 0.32   | 19529   |
| 2 | 12.767 | 23094517 | 98.59  | 2789966 |
| 3 | 13.895 | 145299   | 0.62   | 21135   |
| 4 | 14.368 | 52928    | 0.23   | 13121   |
| 5 | 15.367 | 56836    | 0.24   | 11613   |

## SAMPLE INFORMATION

|                   |                         |                     |                           |
|-------------------|-------------------------|---------------------|---------------------------|
| Sample Name:      | 14171-143               | Acquired By:        | walkup                    |
| Sample Type:      | Unknown                 | Sample Set Name:    | DZOXAgonist paper         |
| Vial:             | 114                     | Acq. Method Set:    | MethodSetAB5T95B15Min     |
| Injection #:      | 1                       | Processing Method:  | 220W280W15MIN             |
| Injection Volume: | 30.00 ul                | Channel Name:       | W2996 280.0nm-4.0         |
| Run Time:         | 30.0 Minutes            | Proc. Chnl. Descr.: | W2996 PDA 280.0 nm at 4.0 |
| Date Acquired:    | 9/5/2020 3:58:14 AM EDT |                     |                           |
| Date Processed:   | 4/2/2021 4:40:01 PM EST |                     |                           |

## Auto-Scaled Chromatogram

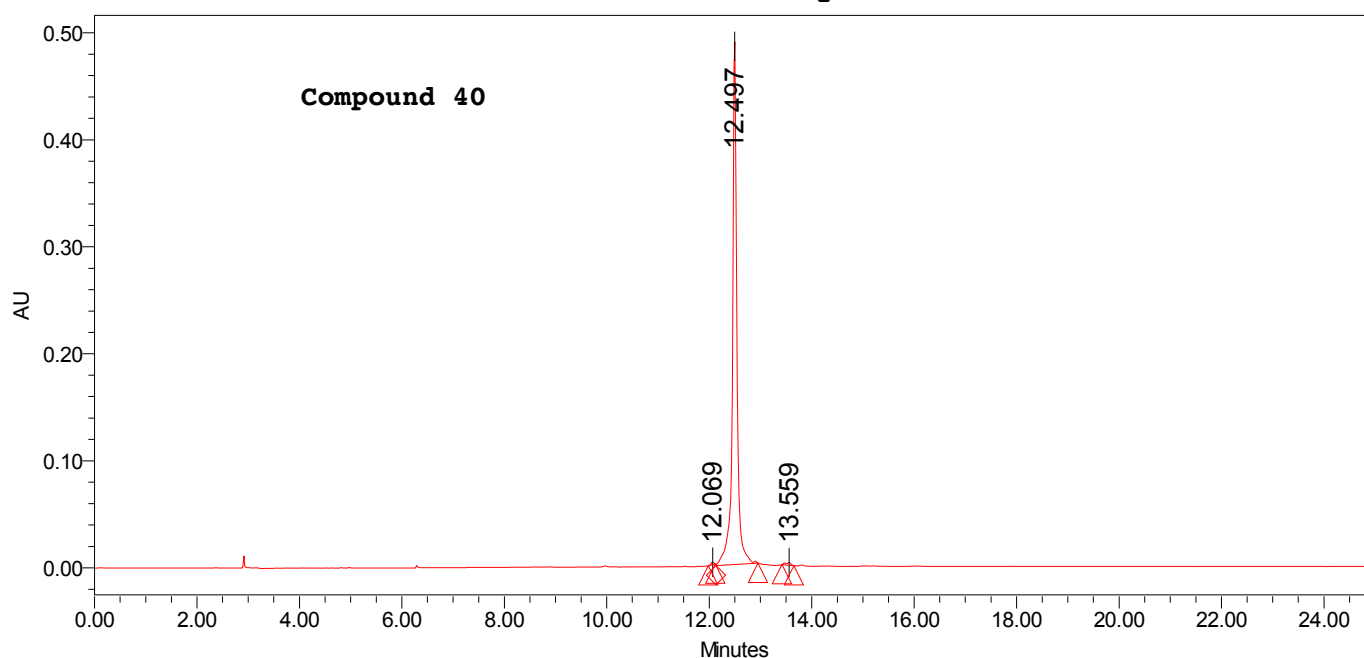

## Peak Results

|   | RT     | Area    | % Area | Height |
|---|--------|---------|--------|--------|
| 1 | 12.069 | 9075    | 0.30   | 2385   |
| 2 | 12.497 | 3007715 | 99.09  | 482507 |
| 3 | 13.559 | 18681   | 0.62   | 2539   |



## SAMPLE INFORMATION

|                   |                          |                     |                           |
|-------------------|--------------------------|---------------------|---------------------------|
| Sample Name:      | DZ14171-171              | Acquired By:        | walkup                    |
| Sample Type:      | Unknown                  | Sample Set Name:    | 14171170195               |
| Vial:             | 27                       | Acq. Method Set:    | MethodSetAB5T95B15Min     |
| Injection #:      | 1                        | Processing Method:  | 220W280W15MIN             |
| Injection Volume: | 10.00 ul                 | Channel Name:       | W2996 280.0nm-4.0         |
| Run Time:         | 30.0 Minutes             | Proc. Chnl. Descr.: | W2996 PDA 280.0 nm at 4.0 |
| Date Acquired:    | 8/31/2020 8:13:45 PM EDT |                     |                           |
| Date Processed:   | 4/2/2021 4:46:38 PM EST  |                     |                           |

## Auto-Scaled Chromatogram

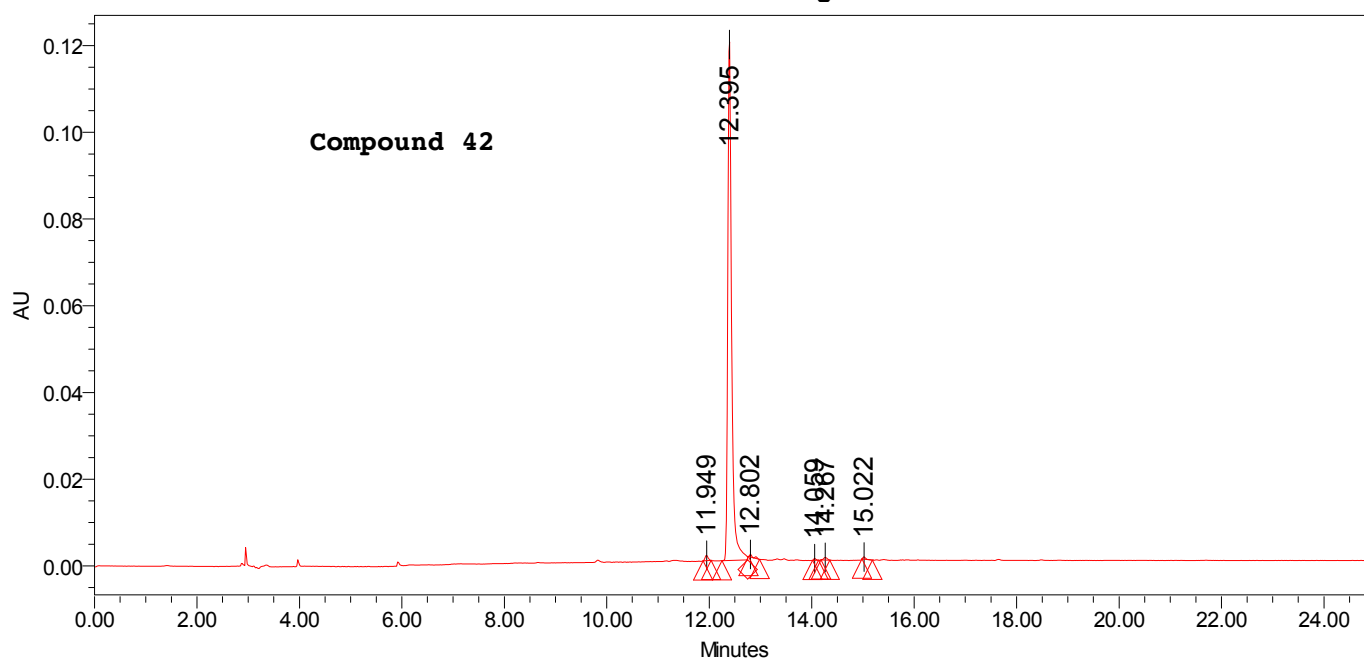

## Peak Results

|   | RT     | Area   | % Area | Height |
|---|--------|--------|--------|--------|
| 1 | 11.949 | 5247   | 0.82   | 1249   |
| 2 | 12.395 | 625949 | 97.82  | 118736 |
| 3 | 12.802 | 2897   | 0.45   | 561    |
| 4 | 14.059 | 1235   | 0.19   | 356    |
| 5 | 14.267 | 2749   | 0.43   | 596    |
| 6 | 15.022 | 1850   | 0.29   | 500    |

## SAMPLE INFORMATION

|                   |                          |                     |                           |
|-------------------|--------------------------|---------------------|---------------------------|
| Sample Name:      | DZ14171-195              | Acquired By:        | walkup                    |
| Sample Type:      | Unknown                  | Sample Set Name:    | 14171170195               |
| Vial:             | 28                       | Acq. Method Set:    | MethodSetAB5T95B15Min     |
| Injection #:      | 1                        | Processing Method:  | 220W280W15MIN             |
| Injection Volume: | 10.00 ul                 | Channel Name:       | W2996 280.0nm-4.0         |
| Run Time:         | 30.0 Minutes             | Proc. Chnl. Descr.: | W2996 PDA 280.0 nm at 4.0 |
| Date Acquired:    | 8/31/2020 8:44:46 PM EDT |                     |                           |
| Date Processed:   | 4/2/2021 4:49:27 PM EST  |                     |                           |

## Auto-Scaled Chromatogram

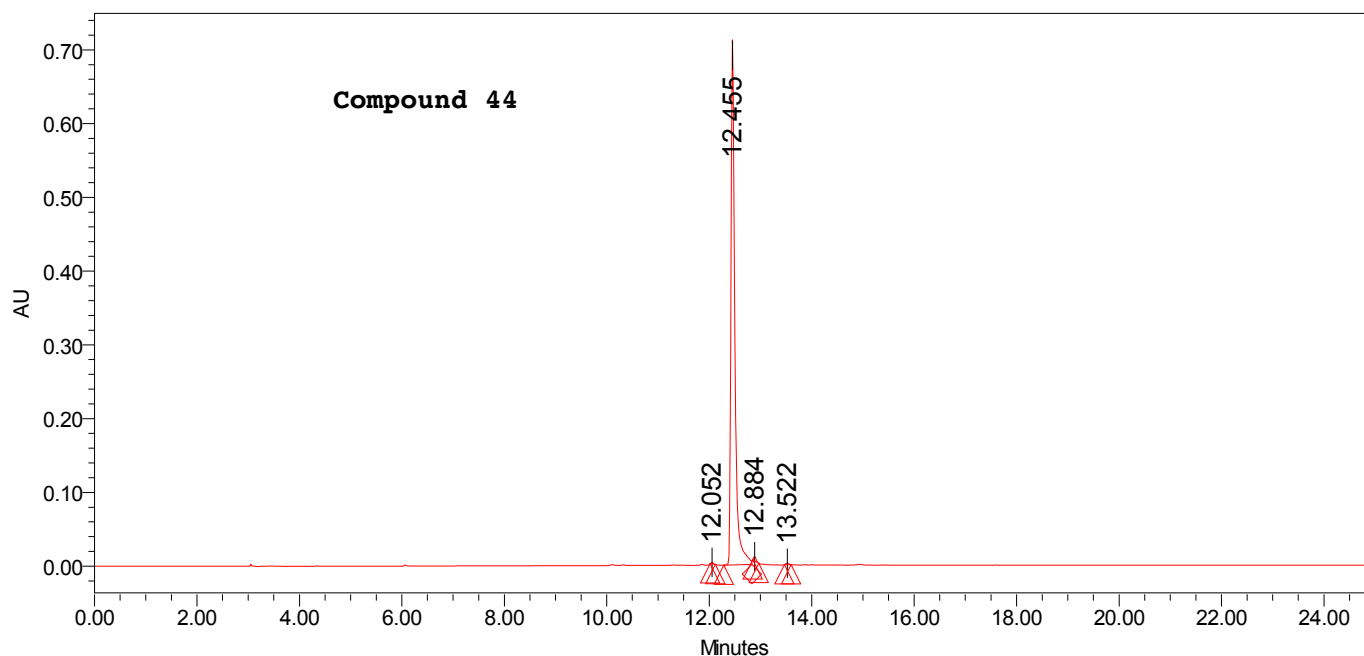

## Peak Results

|   | RT     | Area    | % Area | Height |
|---|--------|---------|--------|--------|
| 1 | 12.052 | 7038    | 0.18   | 2102   |
| 2 | 12.455 | 3786738 | 99.07  | 700017 |
| 3 | 12.884 | 19634   | 0.51   | 5712   |
| 4 | 13.522 | 8852    | 0.23   | 2185   |

# Compound 40

DZ14171-143PureNHMR 01/19/2015 Gain Factor = 1

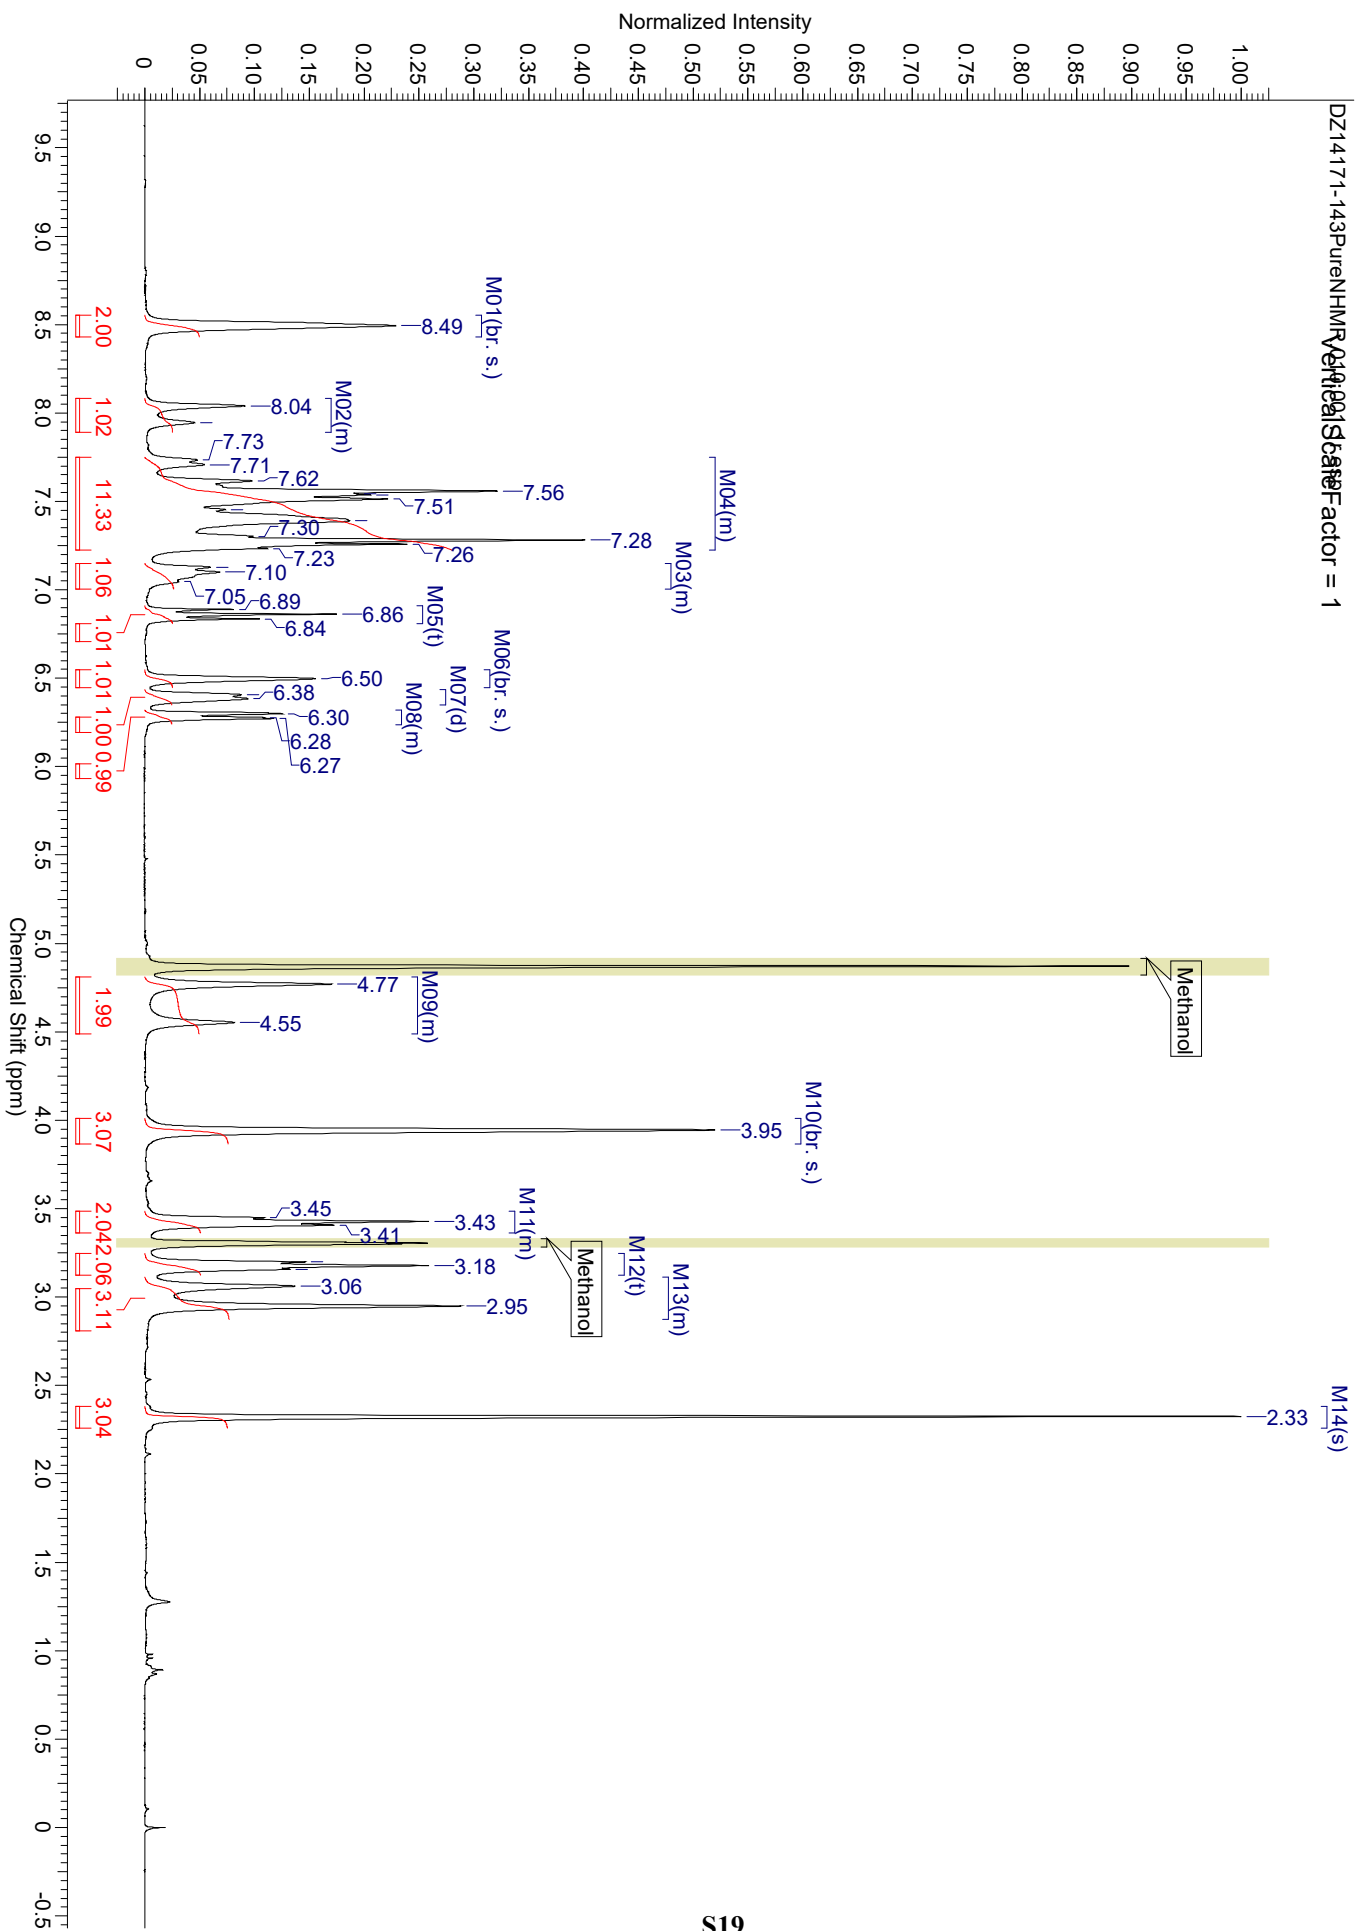

# Compound 40

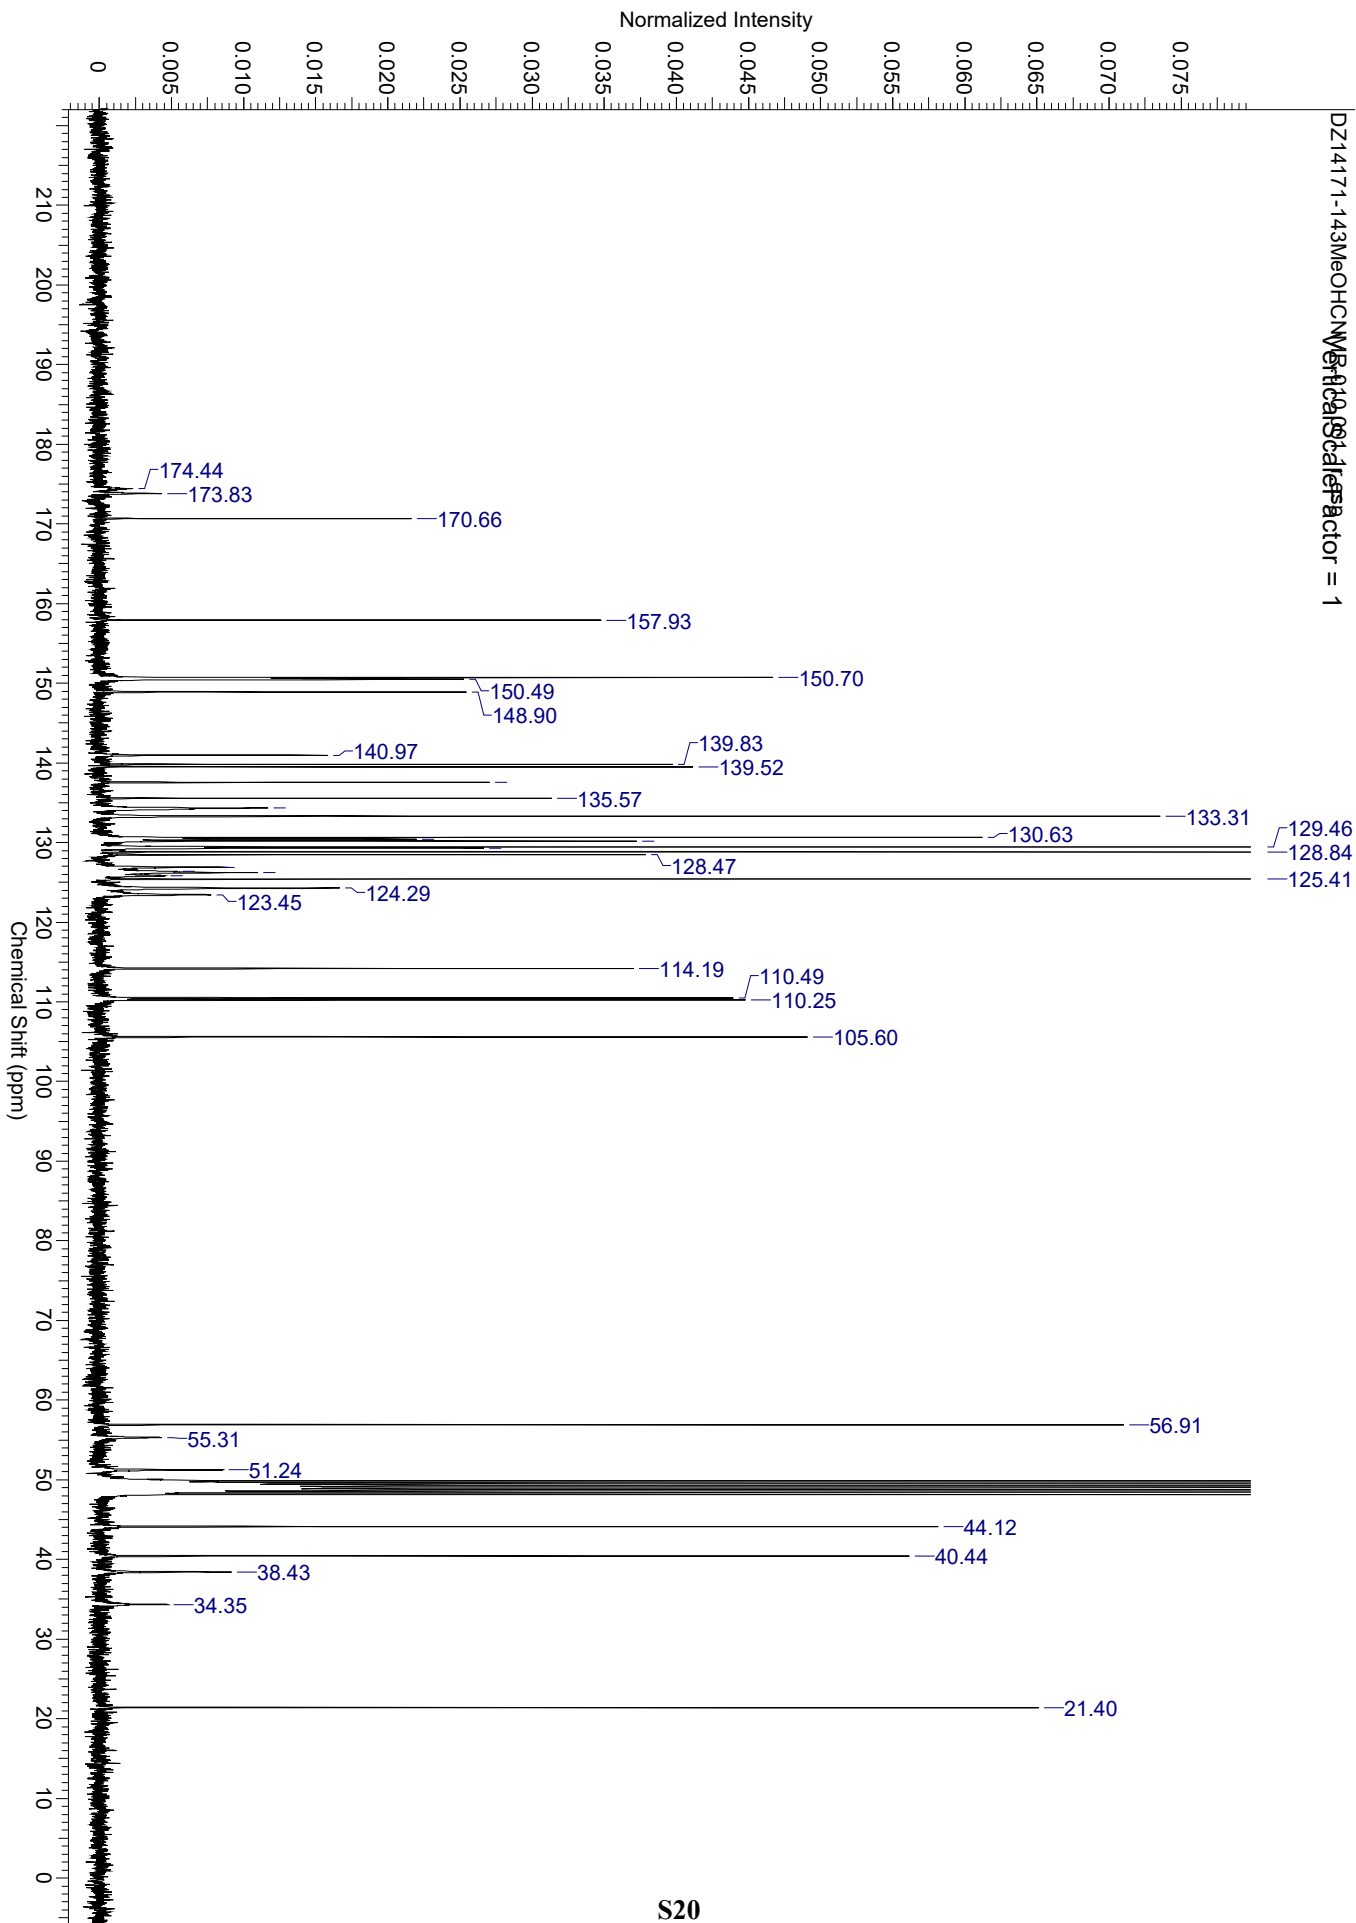

Supplement: NIHMS1791595-supplement-SI.pdf [file NIHMS1791595-supplement-SI.pdf]
